# Supplementary material for: Ion-doped lead-free double perovskite Cs 2 NaBiCl 6 with multiple excitation and tunable emission towards light emitting and anti-counterfeiting applications
Source: Royal Society of Chemistry journal article supplement (doi:10.1039/d4tc03715d), 2024-01-01
Supplement: d4tc03715d1.pdf [file d4tc03715d1.pdf]

## Ion Doped Lead-Free Double Perovskite Cs<sub>2</sub>NaBiCl<sub>6</sub> with Multiple Excitation and Tunable Emission towards Light Emitting and Anti-counterfeiting Applications

Junxiang Pei,<sup>†a</sup>, Haofeng Li,<sup>†a</sup> Xiaodong Yuan,<sup>b</sup> An Su,<sup>c</sup> Dechao Yu,<sup>\*a</sup> and Dawei Zhang<sup>a</sup>

<sup>a</sup>Engineering Research Center of Optical Instrument and System, Ministry of Education and Shanghai Key Lab of Modern Optical System, University of Shanghai for Science and Technology, Shanghai 200093, China

<sup>b</sup>Department of Urology, Ren Ji Hospital, School of Medicine, Shanghai Jiao Tong University, Shanghai, 200127, China

<sup>c</sup>He Chi University · School of Mathematics and Physics, Hechi University, Hechi, 546300, China.

\*Corresponding author: [d.yu@usst.edu.cn](mailto:d.yu@usst.edu.cn)

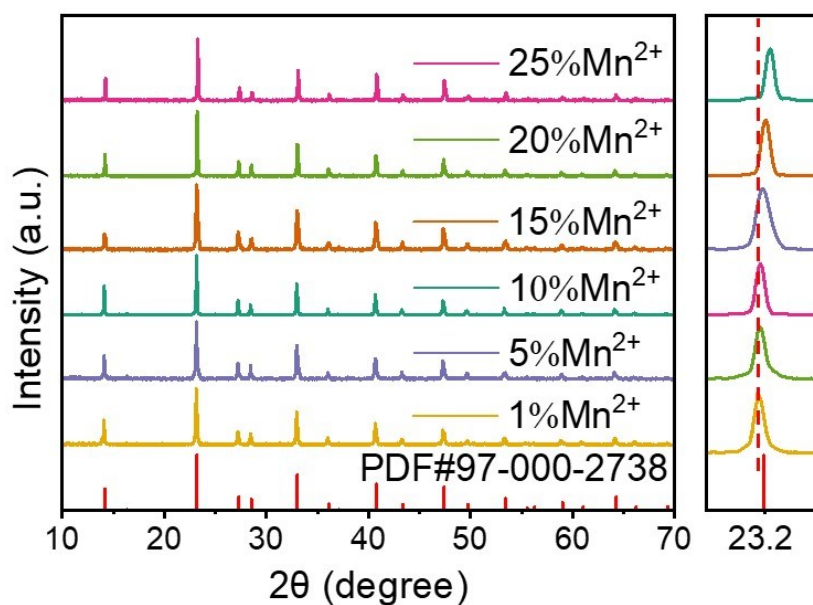

Fig. S1 X-ray diffraction patterns of the as-prepared CNBC: 30% Br, x% Mn<sup>2+</sup> (x=1-25).

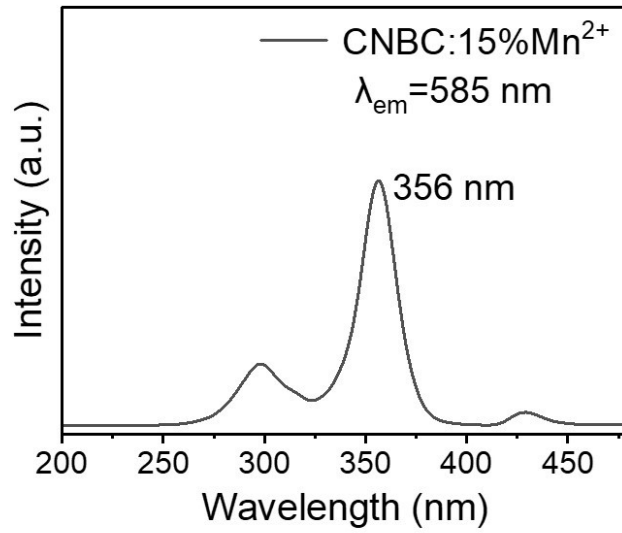

Fig. S2 The PLE spectrum of the as-prepared CNBC: 15% Mn<sup>2+</sup>.

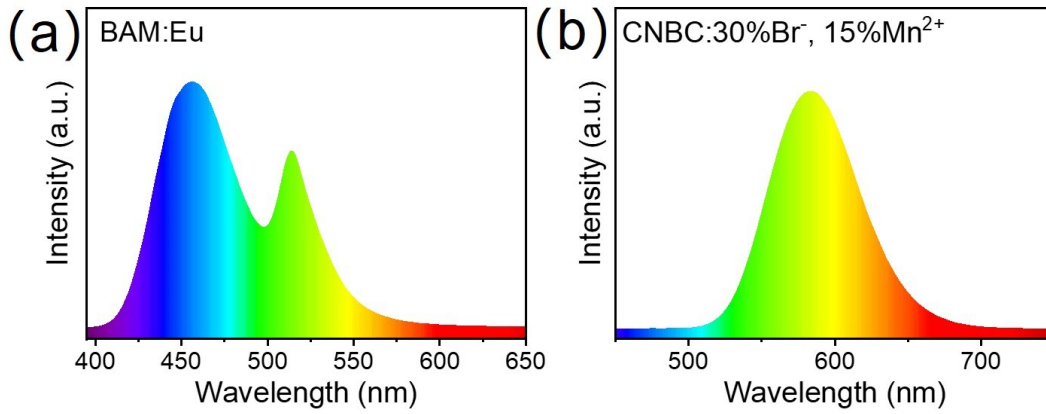

Fig. S3 (a) EL spectra of BaMgAl<sub>10</sub>O<sub>17</sub>: Eu<sup>3+</sup> and (b) CNBC:30% Br<sup>-</sup>, 15% Mn<sup>2+</sup>.

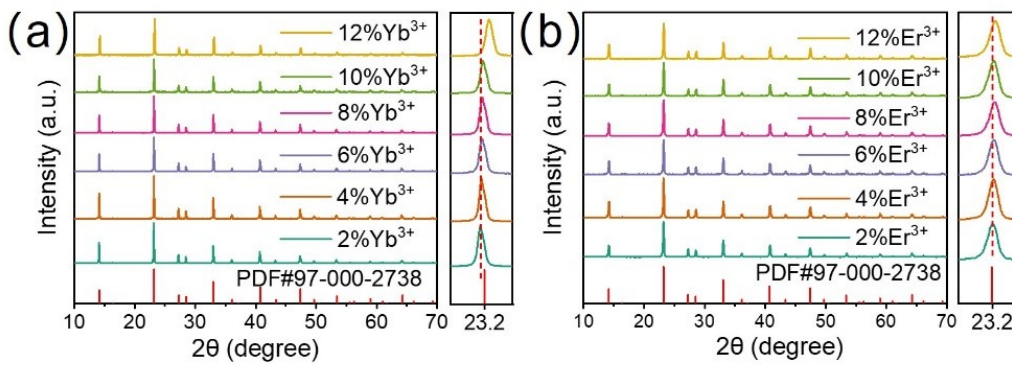

Fig. S4 X-ray diffraction patterns of the as-prepared (a) CNBC: 30% Br<sup>-</sup>, 15% Mn<sup>2+</sup>, 12% Er<sup>3+</sup>, x% Yb<sup>3+</sup> (x=2-12) and (b) CNBC: 30% Br<sup>-</sup>, 15% Mn<sup>2+</sup>, x% Er<sup>3+</sup>, 12% Yb<sup>3+</sup> (x=2-12).

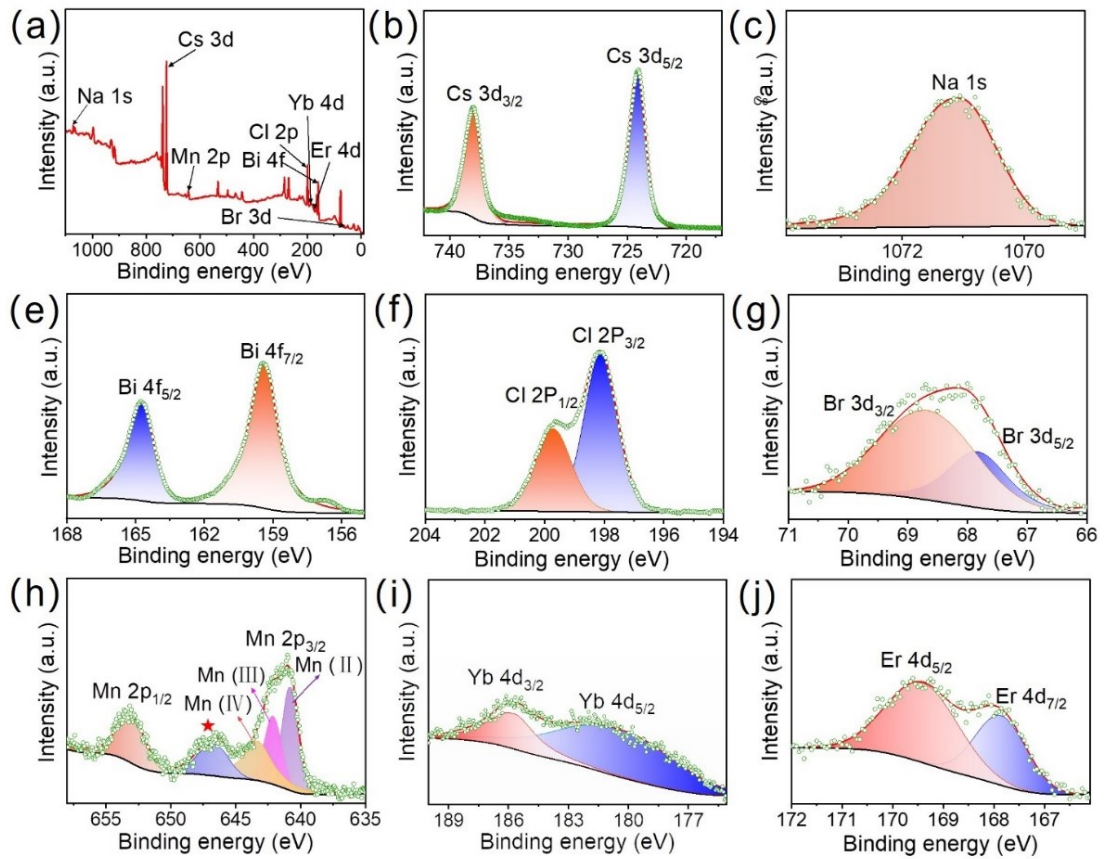

Fig. S5 XPS of CNBC: 30% Br<sup>-</sup>, 15% Mn<sup>2+</sup>, 12% Er<sup>3+</sup>, 12% Yb<sup>3+</sup> powders; (b)~(i) High-resolution XPS spectra of Cs 3d,

Na 1s, Bi 4f, Cl 2p, Br 3d, Mn 2p, Er 4d and Yb 4d.

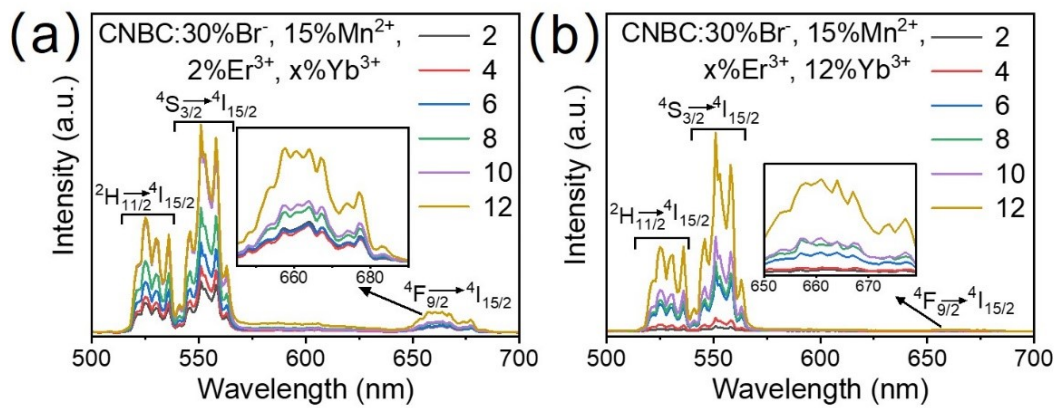

Fig. S6 PL spectra of (a) CNBC:30% Br<sup>-</sup>, 15% Mn<sup>2+</sup>, 12% Er<sup>3+</sup>, x% Yb<sup>3+</sup> (x=2-12),  $\lambda_{\text{ex}} = 980$  nm, and (b) CNBC:30% Br<sup>-</sup>,

15% Mn<sup>2+</sup>, x% Er<sup>3+</sup>, 12% Yb<sup>3+</sup> (x=2-12),  $\lambda_{\text{ex}} = 980$  nm.

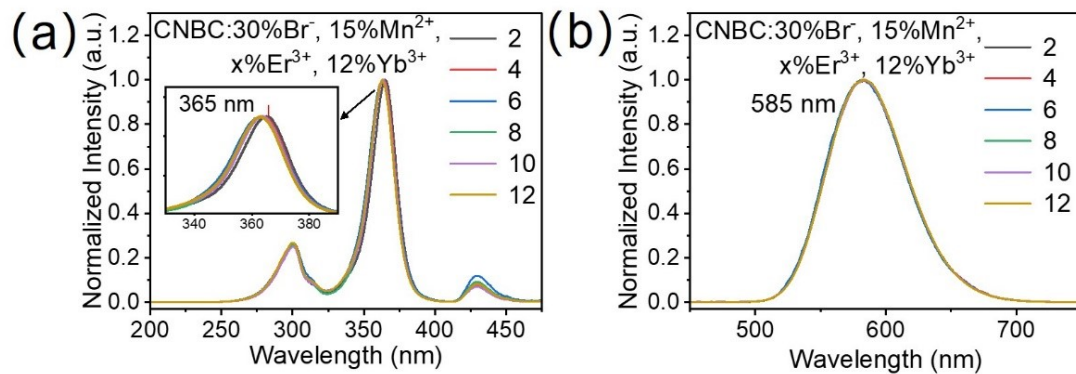

Fig. S7 (a) PLE spectrum of CNBC:30% Br, 15% Mn<sup>2+</sup>, x% Er<sup>3+</sup>, 12% Yb<sup>3+</sup> (x=2-12), monitored emission peak at 585 nm. (b) PL spectrum of CNBC:30% Br, 15% Mn<sup>2+</sup>, x% Er<sup>3+</sup>, 12% Yb<sup>3+</sup> (x=2-12),  $\lambda_{ex}$  = 365 nm.

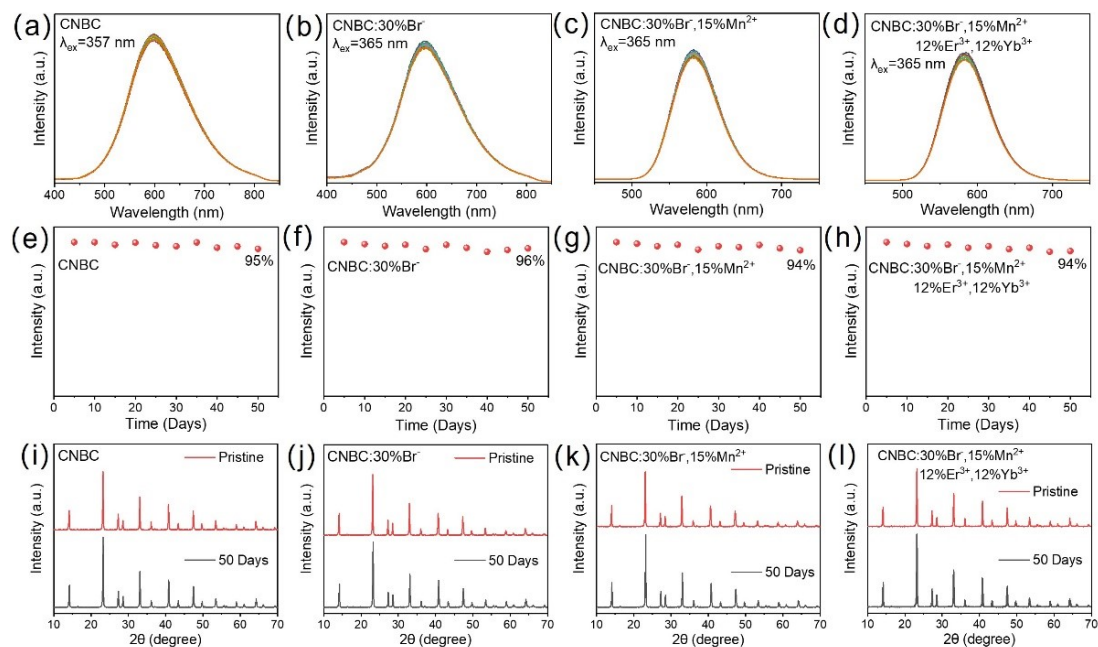

Fig. S8 Spectral stability and XRD patterns of the four different DP samples under ambient environment during 0-50 days.

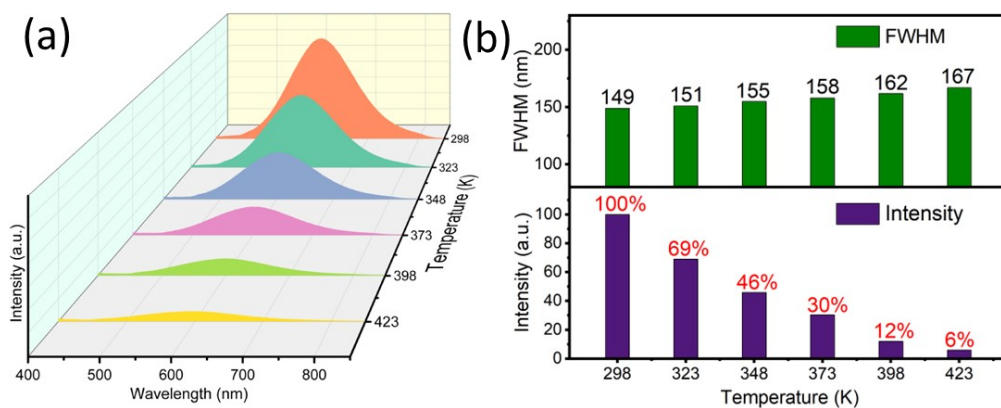

Fig. S9 (a) Temperature-dependent PL spectra of CNBC upon 357 nm excitation; (b) The corresponding FWHM and integral PL intensity.

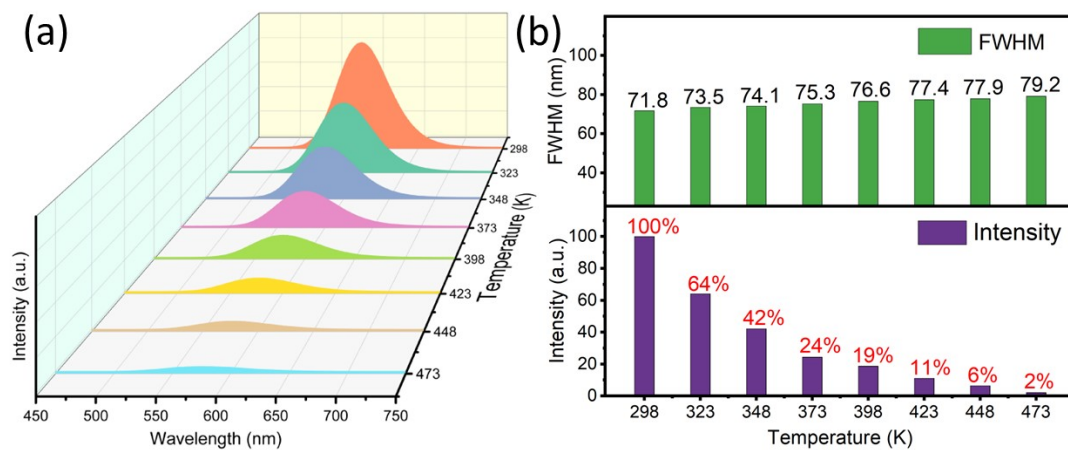

Fig. S10 (a) Temperature-dependent PL spectra of CNBC:30% Br<sup>-</sup>, 15% Mn<sup>2+</sup> upon 365 nm excitation; (b) The corresponding FWHM and integral PL intensity.
